# Supplementary material for: Novel hole transport materials based on N,N′-disubstituted-dihydrophenazine derivatives for electroluminescent diodes
Source: Royal Society of Chemistry journal article supplement (doi:10.1039/c4tc01965b), 2014-01-01

## **Novel hole transport materials based on *N,N'*-disubstituted-dihydrophenazine derivatives for electroluminescent diodes**

**Zhiwen Zheng<sup>a</sup>, Qingchen Dong<sup>b</sup>, Liao Gou<sup>a</sup>, Jian-Hua Su<sup>\*a</sup> and Jinhai Huang<sup>\*a</sup>**

<sup>a</sup> *Key Laboratory for Advanced Materials and Institute of Fine Chemicals, East China University of Science & Technology, Shanghai 200237, P. R. China. Fax: (86) 21-64252288; Tel: (86) 21-64252288; E-mail: huangjh@eucst.edu.cn; bbsjh@eucst.edu.cn*

<sup>b</sup> *MOE Key Laboratory for Interface Science and Engineering in Advanced Materials and Research Center of Advanced Materials Science and Technology, Taiyuan University of Technology, 79 Yingze West Street, Taiyuan 030024, P.R. China.*

# Content

|                                                           |    |
|-----------------------------------------------------------|----|
| <b>1. Synthetic procedure of intermediates 3-11</b> ..... | 1  |
| <b>2. <math>^1\text{H}</math> NMR</b> .....               | 3  |
| 2.1 $^1\text{H}$ NMR of a .....                           | 3  |
| 2.2 $^1\text{H}$ NMR of b.....                            | 3  |
| 2.3 $^1\text{H}$ NMR of c .....                           | 4  |
| 2.4 $^1\text{H}$ NMR of d.....                            | 4  |
| 2.5 $^1\text{H}$ NMR of e .....                           | 5  |
| 2.6 $^1\text{H}$ NMR of f.....                            | 5  |
| 2.7 $^1\text{H}$ NMR of g.....                            | 6  |
| 2.8 $^1\text{H}$ NMR of h.....                            | 6  |
| 2.9 $^1\text{H}$ NMR of i.....                            | 7  |
| <b>3. <math>^{13}\text{C}</math> NMR</b> .....            | 7  |
| 3.1 $^{13}\text{C}$ NMR of a .....                        | 7  |
| 3.2 $^{13}\text{C}$ NMR of b.....                         | 8  |
| 3.3 $^{13}\text{C}$ NMR of c .....                        | 8  |
| 3.4 $^{13}\text{C}$ NMR of d.....                         | 9  |
| 3.5 $^{13}\text{C}$ NMR of e .....                        | 9  |
| 3.6 $^{13}\text{C}$ NMR of f .....                        | 10 |
| 3.7 $^{13}\text{C}$ NMR of g.....                         | 10 |
| 3.8 $^{13}\text{C}$ NMR of h.....                         | 11 |
| 3.9 $^{13}\text{C}$ NMR of i.....                         | 11 |
| <b>4. Mass spectrometry</b> .....                         | 12 |
| 4.1 Mass spectrometry of a .....                          | 12 |
| 4.2 Mass spectrometry of b.....                           | 12 |
| 4.3 Mass spectrometry of c .....                          | 13 |
| 4.4 Mass spectrometry of d.....                           | 13 |
| 4.5 Mass spectrometry of e .....                          | 14 |
| 4.6 Mass spectrometry of f.....                           | 14 |
| <b>5. Electrochemistry of a-i</b> .....                   | 17 |
| 5.1 Electrochemistry of a .....                           | 17 |
| 5.2 Electrochemistry of b.....                            | 17 |
| 5.3 Electrochemistry of c .....                           | 18 |
| 5.4 Electrochemistry of d.....                            | 18 |
| 5.5 Electrochemistry of e .....                           | 19 |
| 5.6 Electrochemistry of f.....                            | 19 |
| 5.7 Electrochemistry of g.....                            | 20 |
| 5.8 Electrochemistry of h.....                            | 20 |
| 5.9 Electrochemistry of i.....                            | 21 |
| <b>6. X-ray crystallography</b> .....                     | 22 |
| <b>7. Thermal property of a-i</b> .....                   | 23 |

## 1. Synthetic procedure of intermediates 3-11

**N-(4-bromophenyl)-N-phenylnaphthalen-1-amine (3):** N-phenylnaphthalen-1-amine (10 g, 45.6 mmol), 1-bromo-4-iodobenzene (12.86 g, 45.6 mmol), copper iodide (1.74 g, 9.1 mmol), potassium hydroxide (5.1 g, 9.1 mmol), 1,10-phenanthroline monohydrate (1.8 g, 9.1 mmol) and 1,2-dimethylbenzene (50 mL) were added to a 100 mL two-necked round-bottomed flask. The mixture was heated to 220 °C for 15 h. Water (10 mL) was added to stop the reaction, and then the mixture was extracted with dichloromethane (3×30 mL). The organic layer was dried with MgSO<sub>4</sub>. The solvent was removed in vacuo and the residue was purified by flash column chromatography by using petroleum ether as the eluent. Viscous liquid; yield: 6.2 g (36%) ; <sup>1</sup>H NMR (400 MHz, CDCl<sub>3</sub>) δ: 8.07 (d, J= 8.5 Hz, 1H), 8.00 (d, J= 8.2 Hz, 1H), 7.89 (d, J= 8.2 Hz, 1H), 7.57 (t, J= 7.7 Hz, 2H), 7.47 (m, 2H), 7.41 – 7.35 (m, 2H), 7.35 – 7.29 (m, 2H), 7.20 (d, J= 7.7 Hz, 2H), 7.09 (t, J= 7.3 Hz, 1H), 7.04 – 6.98 (m, 2H).

**(4-(naphthalen-1-yl(phenyl)amino)phenyl)boronic acid (4):** N-(4-bromophenyl)-N-phenylnaphthalen-1-amine (5 g, 13.4 mmol) was dissolved in dry tetrahydrofuran (50 mL). The nBuLi/hexane solution (8.4 mL, 6.7 mmol) was added dropwise at -78 °C under nitrogen atmosphere for 1 h. Then triisopropyl borate (9.3 mL, 134 mmol) was added slowly. The mixture was reacted at -78 °C for 1 h and then at room temperature overnight. The water was added to stop the reaction and adapt PH to 1-2 by adding 2 M hydrochloric acid. The mixture was extracted with dichloromethane (3×30 mL). The organic layer was dried with MgSO<sub>4</sub>. The solvent was removed in vacuo and the residue was recrystallized by n-hexane. White solid; yield: 4.40 g, 97%. The product was used to the next step without further purification.

**9-(4-bromophenyl)-9H-carbazole (5):** 9-(4-bromophenyl)-9H-carbazole was prepared from 9H-carbazole and 1-bromo-4-iodobenzene by the same synthetic procedure as that for N-(4-bromophenyl)-N-phenylnaphthalen-1-amine. White powder, yield: 8.01 g (82.7%). <sup>1</sup>H NMR (400 MHz, CDCl<sub>3</sub>) δ: 8.17 (d, J = 7.7 Hz, 2H), 7.76 (d, J = 8.6 Hz, 2H), 7.51 – 7.45 (m, 2H), 7.44 (d, J = 7.9 Hz, 2H), 7.40 (d, J = 7.7 Hz, 2H), 7.38 – 7.33 (m, 1H), 7.32 (d, J = 5.4 Hz, 1H).

**(4-(9H-carbazol-9-yl)phenyl)boronic acid (6):** (4-(9H-carbazol-9-yl)phenyl)boronic acid was prepared from 9-(4-bromophenyl)-9H-carbazole by the same synthetic procedure as that for (4-(naphthalen-1-yl(phenyl)amino)phenyl)boronic acid. White powder, yield: 1.58 g (89%).

**2-(2-nitrophenyl)thiophene (7):** A mixed solution of 1-bromo-2-nitrobenzene (3g, 15 mmol) and thiophen-2-ylboronic acid (1.28g, 10 mmol) tetrakis(triphenylphosphine)palladium(0) (0.2 g, 0.172mmol), toluene (20 mL) and 2 N K<sub>2</sub>CO<sub>3</sub> aqueous solution (3.75 mL) was heated at 100 °C with stirring under an argon atmosphere. After 12 h, the mixture was cooled to room temperature. The

mixture was then quenched with water (20 mL) and extracted with CH<sub>2</sub>Cl<sub>2</sub> (3×50 mL). The combined organic phase was dried (anhydrous MgSO<sub>4</sub>). The solvent was removed in vacuo and the residue was purified by flash column chromatography (petroleum ether: dichloromethane=15:1) to give brown oil. <sup>1</sup>H NMR (400 MHz, CDCl<sub>3</sub>) δ: 7.74 (d, *J* = 7.9 Hz, 1H), 7.61 – 7.52 (m, 2H), 7.49 – 7.43 (m, 1H), 7.41 (dd, *J* = 4.7, 1.3 Hz, 1H), 7.12 – 7.03 (m, 2H).

**4H-thieno[3,2-b]indole (8):** 2-(2-nitrophenyl)thiophene (1g, 4.9 mmol) and triphenylphosphine (1.3g, 5.0 mmol) were dissolved in *o*-xylene (20 mL) and heated to reflux for 10 h. The solvent was removed in vacuo and the residue was washed with petroleum ether and hot water successively. Brown powder, yield: 0.6 g (70%). <sup>1</sup>H NMR (400 MHz, CDCl<sub>3</sub>) δ: 8.24 (s, 1H), 7.78 (d, *J* = 7.9 Hz, 1H), 7.47 (d, *J* = 8.1 Hz, 1H), 7.39 (d, *J* = 5.2 Hz, 1H), 7.28-7.30(m, 1H), 7.25 – 7.19 (m, 1H), 7.10 (d, *J* = 5.2 Hz, 1H).

**4-bromo-[N-(2-phenylamino)phenyl]benzamide (9):** 4-bromobenzoic acid (3.0 g, 15 mmol), sulfurous dichloride (5 mL), 1,2-dichloroethane (20 mL) were added in 100 mL one-necked round-bottomed flask and heated to reflux. After 3h, the solvent and sulfurous dichloride was removed in vacuo. Then N<sup>1</sup>-phenylbenzene-1, 2-diamine (2.8 g, 15 mmol) and NMP (20 mL) were added and stirred at room temperature overnight. Water was added to stop the reaction and solid was filtered. The crude product was recrystallized by THF and methanol to obtain white solid (3.56 g, 64.8%). <sup>1</sup>H NMR (400 MHz, DMSO), δ: 9.78(s,1H), 7.82-7.84(d, *J* = 8.8 Hz, 2H), 7.68-7.70(d, *J* = 8.4 Hz, 2H), 7.51-7.53 (d, *J* = 8.0 Hz, 1H), 7.48 (s, 1H), 7.28-7.30(d, *J* = 8.4 Hz,1H), 7.13-7.20(m, 3H), 6.97-7.01(t, *J* = 7.6 Hz, 1H), 6.91-6.93 (d, *J* = 7.6 Hz, 2H), 6.76-6.80(t, *J* = 7.2 Hz,1H).

**2-(4-bromophenyl)-1-phenyl-1H-benzimidazole (10):** 4-bromo-[N-(2-phenylamino)phenyl]benzamide (0.7 g, 1.91 mmol) and acetic acid (10 mL) were added in 50 mL one-necked round-bottomed flask and heated for 12h. The solvent was removed and 5 mL methylalcohol was added in refrigerator to get white solid (0.6 g, 90.2 %). <sup>1</sup>H NMR (400 MHz, DMSO), δ: 7.78-7.81(d, *J* = 7.6 Hz, 1H), 7.54-7.60(m, 5H), 7.43-7.46(m, 4H), 7.26-7.34(m, 2H), 7.17-7.19(d, *J* = 7.2 Hz, 1H).

**(4-(1-phenyl-1H-benzo[d]imidazol-2-yl) phenyl)boronic acid (11):** 2-(4-bromophenyl)-1-phenyl-1*H*-benzimidazole (2 g, 5.75 mmol) was dissolved in dry tetrahydrofuran (30 mL). The *n*BuLi/hexane solution (5.4 mL, 8.6 mmol) was added dropwise at -78 °C under nitrogen atmosphere for 1h. Then triisopropyl borate (1.62 g, 8.6 mmol) was added slowly. The mixture was reacted at -78 °C for 1 h and then at room temperature overnight. The water was added to stop the reaction and adapt PH to 1-2 by adding 2 M hydrochloric acid. The mixture was extracted with dichloromethane (3×30 mL). The organic layer was dried with MgSO<sub>4</sub>. The solvent was removed in vacuo and the residue was recrystallized by *n*-hexane. White solid; yield: 1.05 g (58.3%). The product was used to the next step without further

purification.

## **2. $^1\text{H}$ NMR**

2.1  $^1\text{H}$  NMR of a

2.2  $^1\text{H}$  NMR of b

2.3  $^1\text{H}$  NMR of c

2.4  $^1\text{H}$  NMR of d

2.5  $^1\text{H}$  NMR of e

2.6  $^1\text{H}$  NMR of f

2.7  $^1\text{H}$  NMR of g

2.8  $^1\text{H}$  NMR of h



## 2.9 $^1\text{H}$ NMR of i

## 3. $^{13}\text{C}$ NMR

### 3.1 $^{13}\text{C}$ NMR of a

### 3.2 $^{13}\text{C}$ NMR of b

### 3.3 $^{13}\text{C}$ NMR of c

3.4  $^{13}\text{C}$  NMR of d

3.5  $^{13}\text{C}$  NMR of e

3.6  $^{13}\text{C}$  NMR of f

3.7  $^{13}\text{C}$  NMR of g

3.8  $^{13}\text{C}$  NMR of h

3.9  $^{13}\text{C}$  NMR of i

## 4. Mass spectrometry

### 4.1 Mass spectrometry of a

#### Elemental Composition Report

Page 1

##### Single Mass Analysis

Tolerance = 30.0 mDa / DBE: min = -1.5, max = 100.0

Element prediction: Off

Number of isotope peaks used for i-FIT = 2

Monoisotopic Mass, Even Electron Ions

29 formula(e) evaluated with 2 results within limits (up to 1 closest results for each mass)

Elements Used:

C: 0-48 H: 0-100 N: 0-3

JH-SU

ECUST institute of Fine Chem

23-Oct-2013

16:24:38

1: TOF MS ES+

1.28e+004

TH-ZZZ-111 64 (0.483) Cm (64:68)

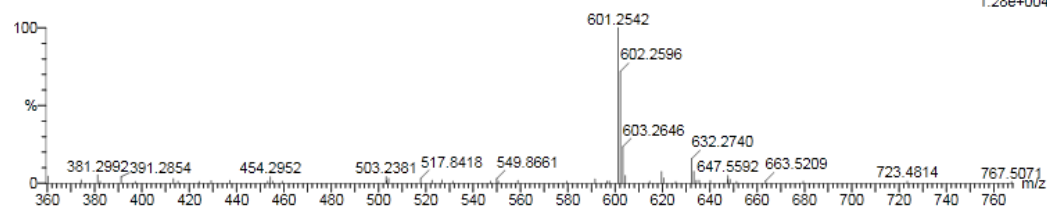

Minimum:

Maximum: 30.0 50.0 -1.5 100.0

| Mass     | Calc. Mass | mDa | PPM | DBE  | i-FIT | i-FIT (Norm) | Formula    |
|----------|------------|-----|-----|------|-------|--------------|------------|
| 602.2596 | 602.2596   | 0.0 | 0.0 | 30.5 | 17.1  | 0.0          | C44 H32 N3 |

### 4.2 Mass spectrometry of b

#### Elemental Composition Report

Page 1

##### Single Mass Analysis

Tolerance = 30.0 mDa / DBE: min = -1.5, max = 100.0

Element prediction: Off

Number of isotope peaks used for i-FIT = 2

Monoisotopic Mass, Odd and Even Electron Ions

17 formula(e) evaluated with 1 results within limits (up to 1 closest results for each mass)

Elements Used:

C: 0-50 H: 0-100 N: 0-3

JH-SU

ECUST institute of Fine Chem

23-Oct-2013

16:29:14

1: TOF MS ES+

1.14e+004

TH-ZZZ-333 2 (0.112) Cm (2:8)

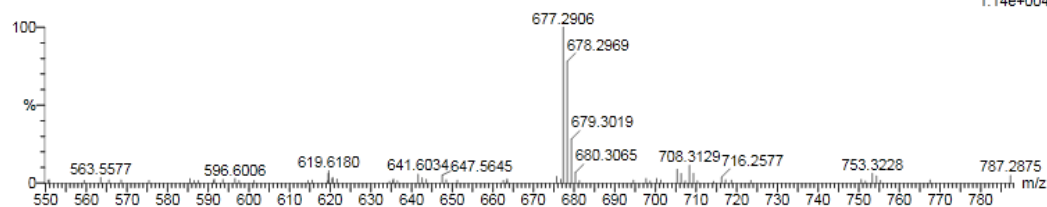

Minimum:

Maximum: 30.0 50.0 -1.5 100.0

| Mass     | Calc. Mass | mDa | PPM | DBE  | i-FIT | i-FIT (Norm) | Formula    |
|----------|------------|-----|-----|------|-------|--------------|------------|
| 678.2969 | 678.2909   | 6.0 | 8.8 | 34.5 | 17.3  | 0.0          | C50 H36 N3 |

## 4.3 Mass spectrometry of c

### Elemental Composition Report

Page 1

#### Single Mass Analysis

Tolerance = 30.0 mDa / DBE: min = -1.5, max = 100.0

Element prediction: Off

Number of isotope peaks used for i-FIT = 2

Monoisotopic Mass, Even Electron Ions

18 formula(e) evaluated with 1 results within limits (up to 1 closest results for each mass)

Elements Used:

C: 0-48 H: 0-100 N: 0-3

JH-SU

ECUST institute of Fine Chem

23-Oct-2013

16:19:40

1: TOF MS ES+

2.22e+003

TH-ZZZ-222 48 (0.391) Cm (48:51)

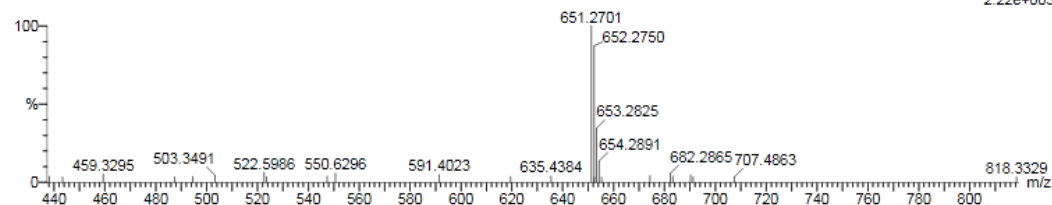

Minimum: -1.5  
Maximum: 30.0 50.0 100.0

| Mass     | Calc. Mass | mDa  | PPM  | DBE  | i-FIT | i-FIT (Norm) | Formula    |
|----------|------------|------|------|------|-------|--------------|------------|
| 652.2750 | 652.2753   | -0.3 | -0.5 | 33.5 | 23.4  | 0.0          | C48 H34 N3 |

## 4.4 Mass spectrometry of d

### Elemental Composition Report

Page 1

#### Single Mass Analysis

Tolerance = 30.0 mDa / DBE: min = -1.5, max = 100.0

Element prediction: Off

Number of isotope peaks used for i-FIT = 2

Monoisotopic Mass, Even Electron Ions

12 formula(e) evaluated with 2 results within limits (up to 1 closest results for each mass)

Elements Used:

C: 0-55 H: 0-50 N: 0-5

TIAN-H

ECUST institute of Fine Chem

25-Nov-2013

20:43:15

1: TOF MS ES+

1.13e+004

TH-ZZZ-777 59 (1.895) Cm (58:74)

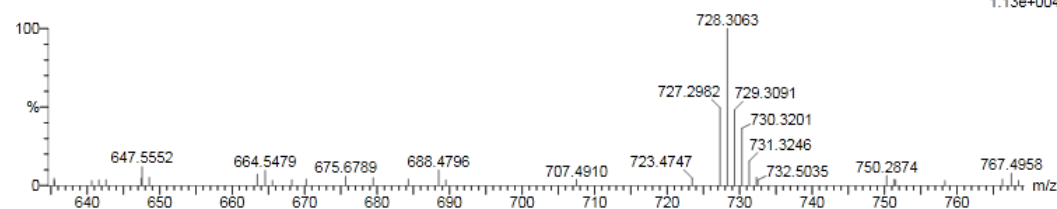

Minimum: -1.5  
Maximum: 30.0 50.0 100.0

| Mass     | Calc. Mass | mDa  | PPM  | DBE  | i-FIT | i-FIT (Norm) | Formula    |
|----------|------------|------|------|------|-------|--------------|------------|
| 728.3063 | 728.3066   | -0.3 | -0.4 | 37.5 | 15.1  | 0.0          | C54 H38 N3 |

## 4.5 Mass spectrometry of e

### Elemental Composition Report

Page 1

#### Single Mass Analysis

Tolerance = 30.0 mDa / DBE: min = -1.5, max = 100.0

Element prediction: Off

Number of isotope peaks used for i-FIT = 2

Monoisotopic Mass, Even Electron Ions

26 formula(e) evaluated with 3 results within limits (up to 1 closest results for each mass)

Elements Used:

C: 0-55 H: 0-50 N: 0-5

TIAN-H

ECUST institute of Fine Chem

25-Nov-2013

20:52:49

1: TOF MS ES+

1.36e+004

TH-ZZZ-888 29 (0.988) Cm (10:34)

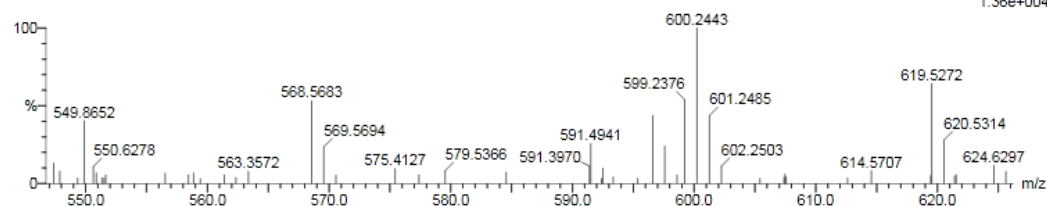

Minimum: 30.0 50.0 -1.5  
Maximum: 30.0 50.0 100.0

| Mass     | Calc. Mass | mDa | PPM | DBE  | i-FIT | i-FIT (Norm) | Formula    |
|----------|------------|-----|-----|------|-------|--------------|------------|
| 600.2443 | 600.2440   | 0.3 | 0.5 | 31.5 | 13.8  | 0.0          | C44 H30 N3 |

## 4.6 Mass spectrometry of f

### Elemental Composition Report

Page 1

#### Single Mass Analysis

Tolerance = 30.0 mDa / DBE: min = -1.5, max = 100.0

Element prediction: Off

Number of isotope peaks used for i-FIT = 2

Monoisotopic Mass, Even Electron Ions

130 formula(e) evaluated with 13 results within limits (up to 1 closest results for each mass)

Elements Used:

C: 0-50 H: 0-50 N: 0-5 S: 0-4

TIAN-H

ECUST institute of Fine Chem

25-Nov-2013

20:37:51

1: TOF MS ES+

1.26e+004

TH-ZZZ-666 29 (0.988) Cm (17:30)

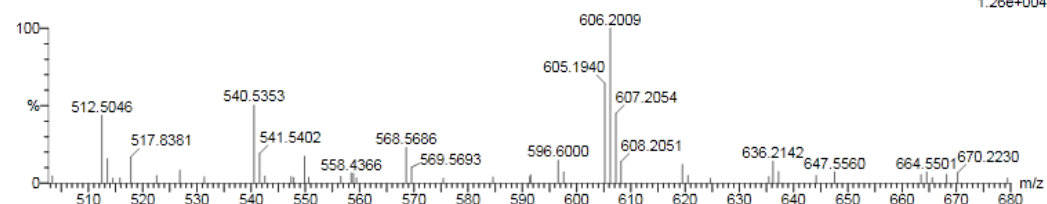

Minimum: 30.0 50.0 -1.5  
Maximum: 30.0 50.0 100.0

| Mass     | Calc. Mass | mDa | PPM | DBE  | i-FIT | i-FIT (Norm) | Formula      |
|----------|------------|-----|-----|------|-------|--------------|--------------|
| 606.2009 | 606.2004   | 0.5 | 0.8 | 30.5 | 12.7  | 0.0          | C42 H28 N3 S |



## 4.7 Mass spectrometry of g

### Elemental Composition Report

Page 1

#### Single Mass Analysis

Tolerance = 30.0 mDa / DBE: min = -1.5, max = 100.0

Element prediction: Off

Number of isotope peaks used for i-FIT = 2

Monoisotopic Mass, Odd and Even Electron Ions  
43 formula(e) evaluated with 4 results within limits (up to 1 closest results for each mass)

Elements Used:

C: 0-100 H: 0-100 N: 0-4

JH-SU

ECUST institute of Fine Chem

23-Oct-2013

16:13:25

1: TOF MS ES+

1.89e+004

TH-ZZZ-444 87 (0.627) Cm (82:93)

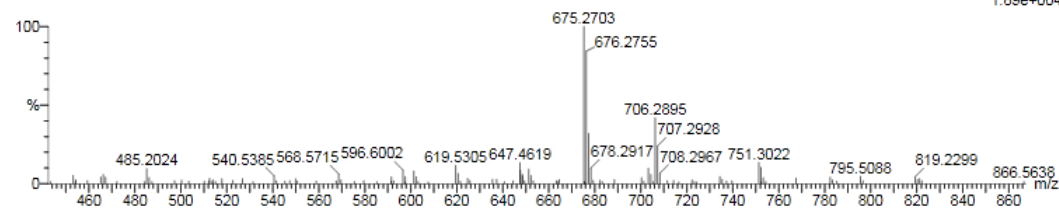

Minimum: -1.5  
Maximum: 30.0 50.0 100.0

| Mass     | Calc. Mass | mDa | PPM | DBE  | i-FIT | i-FIT (Norm) | Formula    |
|----------|------------|-----|-----|------|-------|--------------|------------|
| 676.2755 | 676.2753   | 0.2 | 0.3 | 35.5 | 18.7  | 0.0          | C50 H34 N3 |

## 4.8 Mass spectrometry of h

### Elemental Composition Report

Page 1

#### Single Mass Analysis

Tolerance = 30.0 mDa / DBE: min = -1.5, max = 100.0

Element prediction: Off

Number of isotope peaks used for i-FIT = 2

Monoisotopic Mass, Even Electron Ions  
21 formula(e) evaluated with 3 results within limits (up to 1 closest results for each mass)

Elements Used:

C: 0-60 H: 0-40 N: 0-5

H-TIAN

ECUST institute of Fine Chem

03-Dec-2013

22:08:35

1: TOF MS ES+

2.09e+003

TH-ZZZ-910 134 (0.928) Cm (119:135)

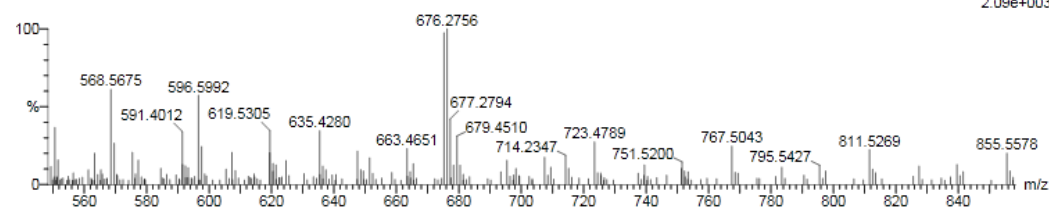

Minimum: -1.5  
Maximum: 30.0 50.0 100.0

| Mass     | Calc. Mass | mDa | PPM | DBE  | i-FIT | i-FIT (Norm) | Formula    |
|----------|------------|-----|-----|------|-------|--------------|------------|
| 676.2756 | 676.2753   | 0.3 | 0.4 | 35.5 | 21.4  | 0.0          | C50 H34 N3 |

## 4.9 Mass spectrometry of i

### Elemental Composition Report

Page 1

#### Single Mass Analysis

Tolerance = 30.0 mDa / DBE: min = -1.5, max = 100.0

Element prediction: Off

Number of isotope peaks used for i-FIT = 2

Monoisotopic Mass, Even Electron Ions

31 formula(e) evaluated with 3 results within limits (up to 1 closest results for each mass)

Elements Used:

C: 0-60 H: 0-40 N: 0-8

H-TIAN

ECUST institute of Fine Chem

29-Nov-2013

21:35:42

1: TOF MS ES+

1.19e+004

TH-ZZZ-555 68 (0.512) Cm (67.68)

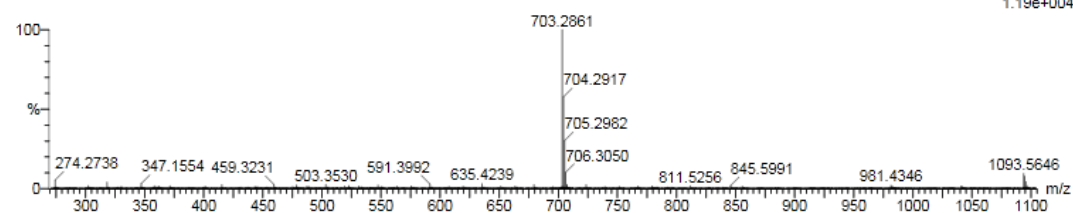

Minimum:

Maximum: 30.0 50.0 -1.5 100.0

| Mass     | Calc. Mass | mDa  | PPM  | DBE  | i-FIT | i-FIT (Norm) | Formula    |
|----------|------------|------|------|------|-------|--------------|------------|
| 703.2861 | 703.2862   | -0.1 | -0.1 | 36.5 | 190.4 | 0.0          | C51 H35 N4 |

## 5. Electrochemistry of a-i

### 5.1 Electrochemistry of a

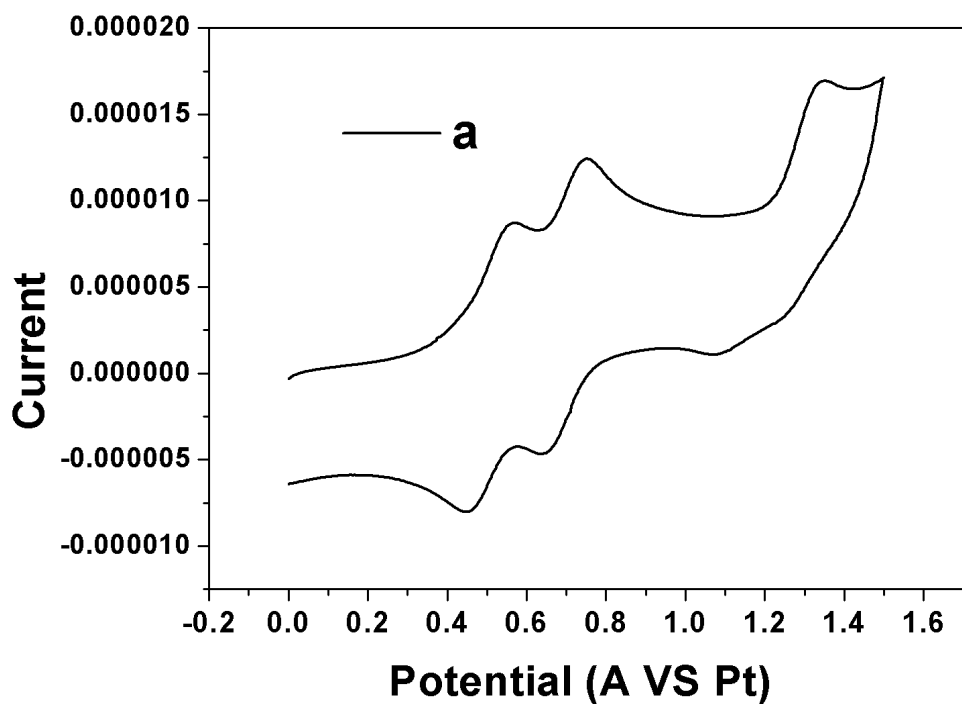

### 5.2 Electrochemistry of b

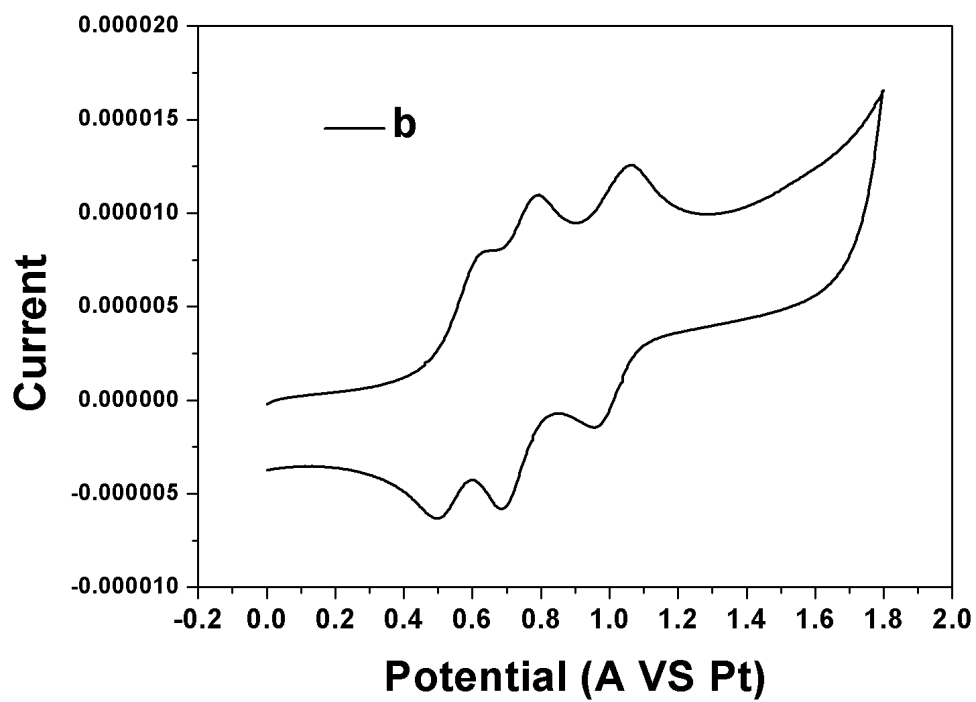

### 5.3 Electrochemistry of c

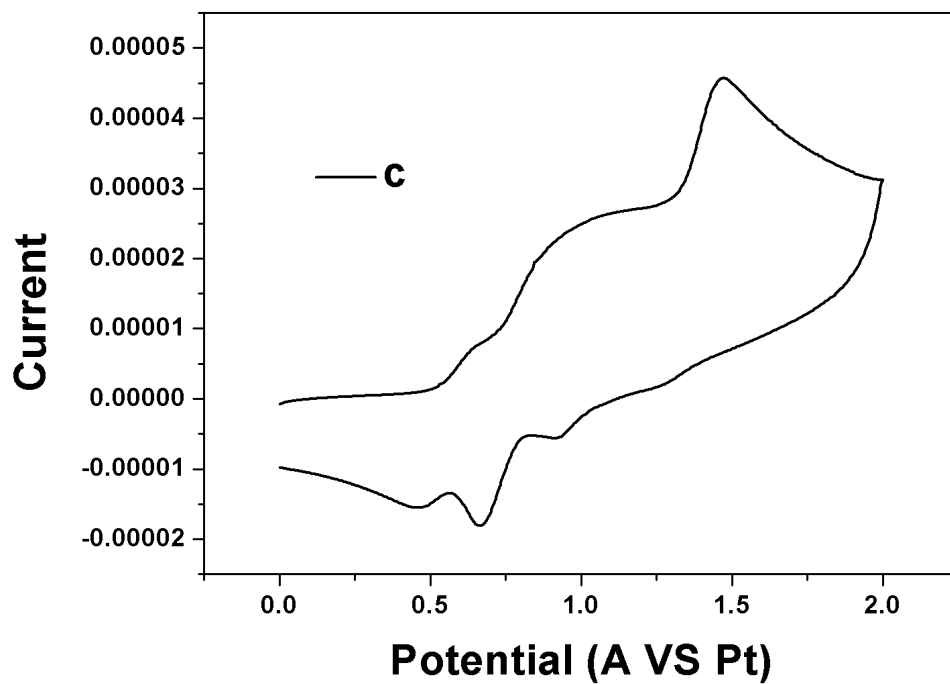

### 5.4 Electrochemistry of d

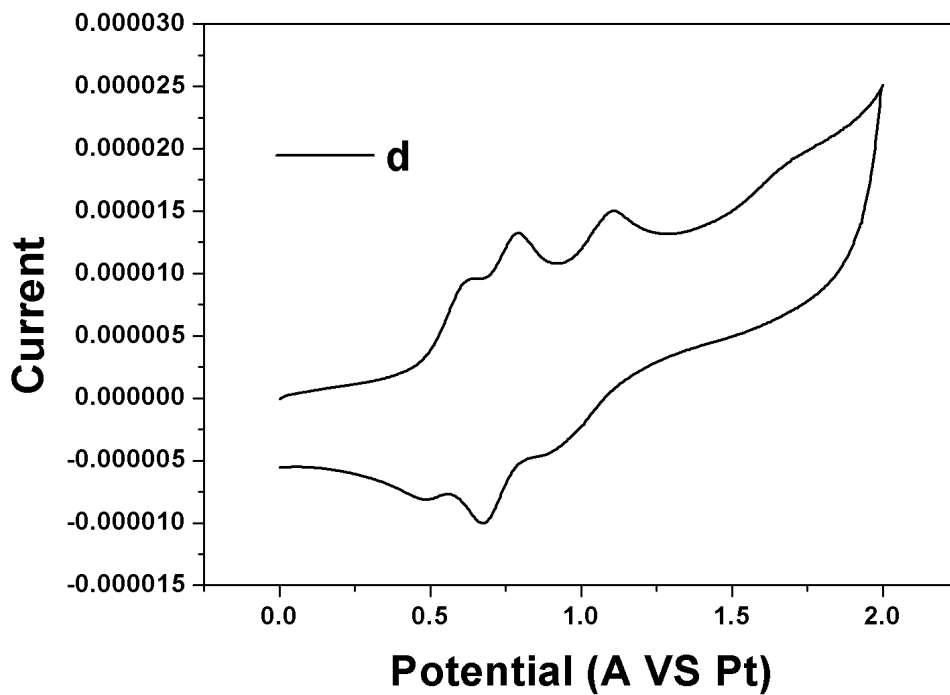

### 5.5 Electrochemistry of e

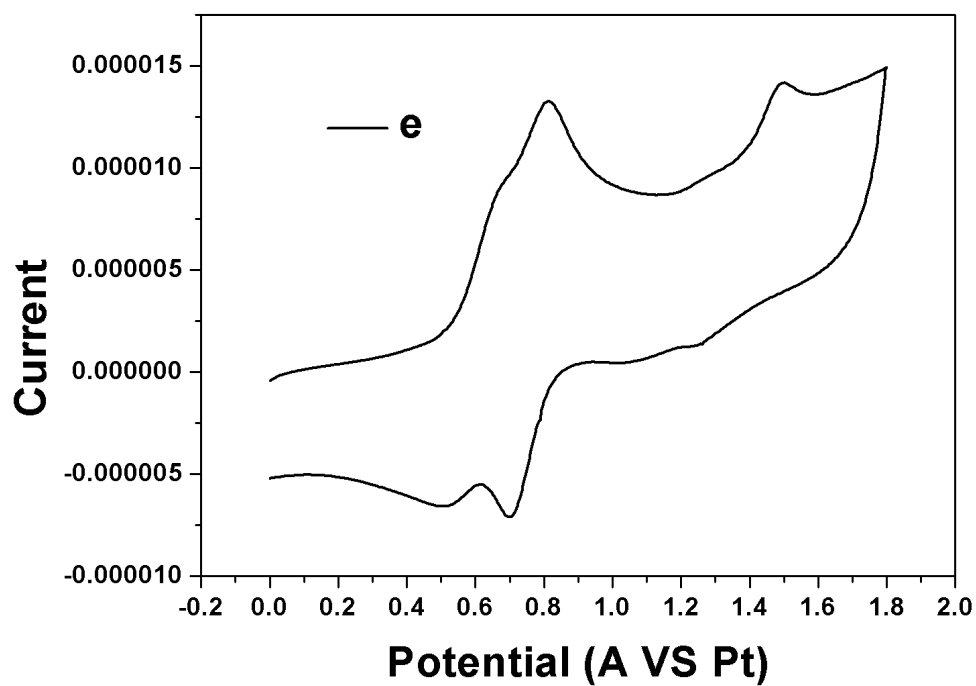

### 5.6 Electrochemistry of f

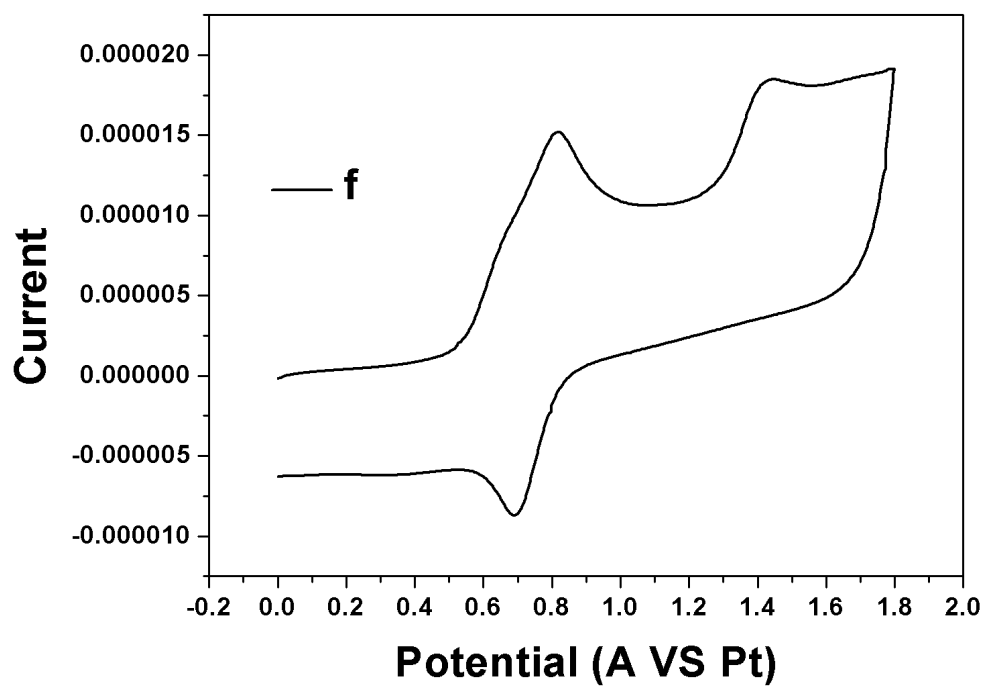

### 5.7 Electrochemistry of g

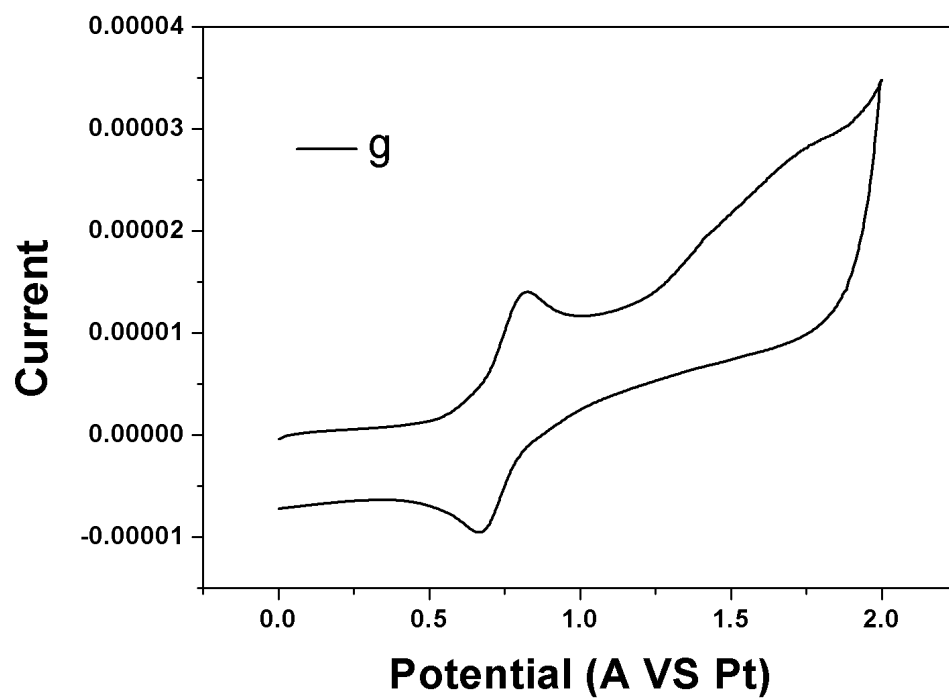

### 5.8 Electrochemistry of h

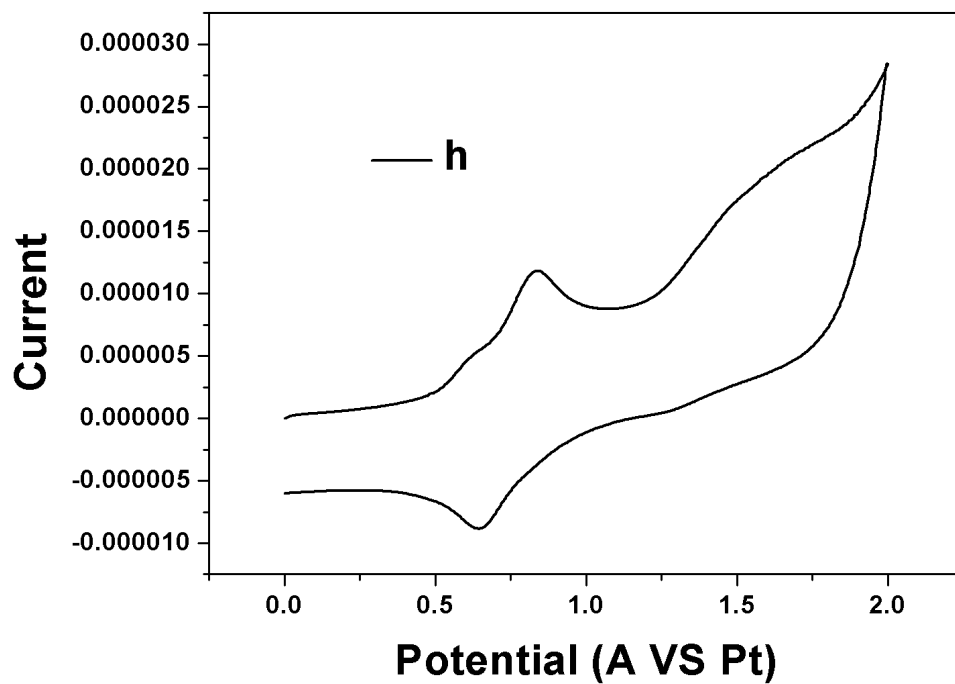

## 5.9 Electrochemistry of i

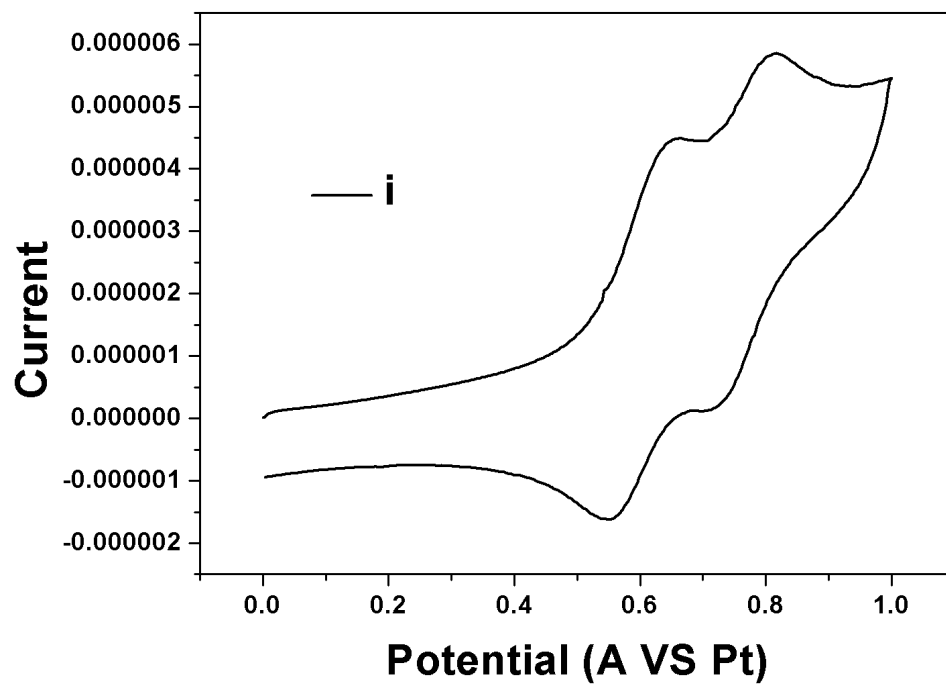

## 6. X-ray crystallography

|                                             | <b>a</b>                                       | <b>e</b>                                         | <b>i</b>                                                       |
|---------------------------------------------|------------------------------------------------|--------------------------------------------------|----------------------------------------------------------------|
| <b>empirical formula</b>                    | C <sub>44</sub> H <sub>31</sub> N <sub>3</sub> | C <sub>45</sub> H <sub>31</sub> ClN <sub>3</sub> | C <sub>52</sub> H <sub>36</sub> Cl <sub>2</sub> N <sub>4</sub> |
| <b>formula weight</b>                       | 601.72                                         | 649.18                                           | 787.75                                                         |
| <b>temperature</b>                          | 140(2) K                                       | 140(2) K                                         | 140(2) K                                                       |
| <b>wavelength, Å</b>                        | 0.71073                                        | 0.71073                                          | 0.71073                                                        |
| <b>crystal system</b>                       | Triclinic                                      | Triclinic                                        | Triclinic                                                      |
| <b>space group</b>                          | P -1                                           | P -1                                             | P -1                                                           |
| <b>a, Å</b>                                 | 9.5653(13)                                     | 9.322(5)                                         | 9.4937(15)                                                     |
| <b>b, Å</b>                                 | 11.8383(16)                                    | 12.934(7)                                        | 10.0154(16)                                                    |
| <b>c, Å</b>                                 | 14.678 (2)                                     | 14.662(8)                                        | 21.812(4)                                                      |
| <b>α (deg)</b>                              | 102.839(3)                                     | 75.264(9)                                        | 101.429(4)                                                     |
| <b>β (deg)</b>                              | 96.717(3)                                      | 81.913(10)                                       | 97.164(5)                                                      |
| <b>γ (deg)</b>                              | 102.722(3)                                     | 71.406(11)                                       | 104.122(3)                                                     |
| <b>V(Å<sup>3</sup>)</b>                     | 1556.5(4)                                      | 1616.9(16)                                       | 1938.5(6)                                                      |
| <b>Z</b>                                    | 2                                              | 2                                                | 2                                                              |
| <b>D<sub>calcd</sub>(g cm<sup>-3</sup>)</b> | 1.284                                          | 1.333                                            | 1.350                                                          |
| <b>μ(mm<sup>-1</sup>)</b>                   | 0.075                                          | 0.158                                            | 0.212                                                          |
| <b>F(000)</b>                               | 632                                            | 678                                              | 820                                                            |
| <b>θ range(deg)</b>                         | 1.824 to 30.647                                | 1.704 to 25.999                                  | 0.969 to 30.698                                                |
| <b>reflections collected</b>                | 15907                                          | 11776                                            | 19691                                                          |
| <b>independent reflections</b>              | 9511                                           | 6345                                             | 11817                                                          |
| <b>R<sub>int</sub></b>                      | 0.0414                                         | 0.0857                                           | 0.0651                                                         |
| <b>R1, wR2[I&gt;2.0σ(I)]</b>                | 0.0604, 0.1189                                 | 0.0729, 0.1722                                   | 0.0755, 0.1931                                                 |
| <b>R1, wR2(all data)</b>                    | 0.1262, 0.1466                                 | 0.1697, 0.2258                                   | 0.1312, 0.2283                                                 |
| <b>GoF on F<sup>2</sup></b>                 | 0.946                                          | 0.962                                            | 0.962                                                          |



## 7. Thermal property of a-i

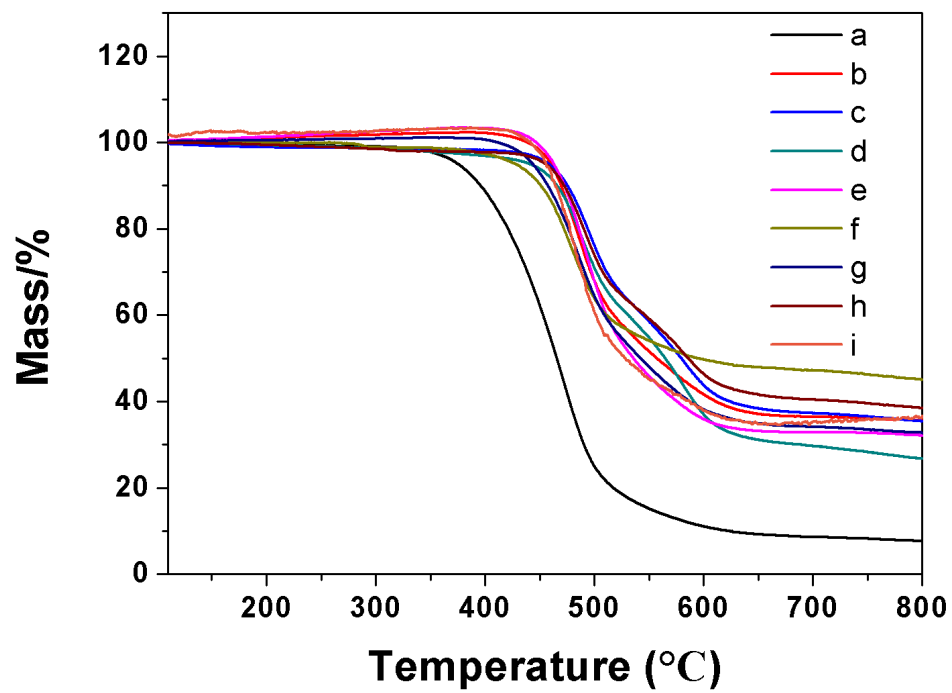

Supplement: c4tc01965b1.pdf [file c4tc01965b1.pdf]
